# Supplementary material for: A new strategy for synthesizing yolk–shell V2O5 powders with low melting temperature for high performance Li-ion batteries
Source: Royal Society of Chemistry journal article supplement (doi:10.1039/c3nr02625f), 2013-01-01
Supplement: c3nr02625f.pdf [file c3nr02625f.pdf]

## Supporting Information

### New strategy for synthesizing yolk-shell $V_2O_5$ powders with low melting temperature for high performance Li-ion batteries

You Na Ko,<sup>ab</sup> Yun Chan Kang<sup>\*a</sup> and Seung Bin Park<sup>b</sup>

<sup>a</sup>Department of Chemical Engineering, Konkuk University, 1 Hwayang-dong, Gwangjin-gu, Seoul 143-701, Korea

<sup>b</sup>Department of Chemical and Biomolecular Engineering, Korea Advanced Institute of Science and Technology, 291 Daehak-ro, Yuseong-gu, Daejeon 305-701, Korea

#### **This file includes:**

- Morphologies of the  $V_2O_3$ -C precursor powders directly prepared by spray pyrolysis at various temperatures.
- XRD patterns of the the  $V_2O_3$ -C precursor powders, combusted  $V_2O_5$  powders at different temperatures and dense structured  $V_2O_5$  powders.
- Morphologies of the  $V_2O_5$  powders obtained by combustion of  $V_2O_3$ -C composite powders at different temperatures.
- TG curves of the  $V_2O_5$  powders combusted at 300 and 400 °C.
- TEM images of the dense structured  $V_2O_5$  powders prepared by spray pyrolysis.

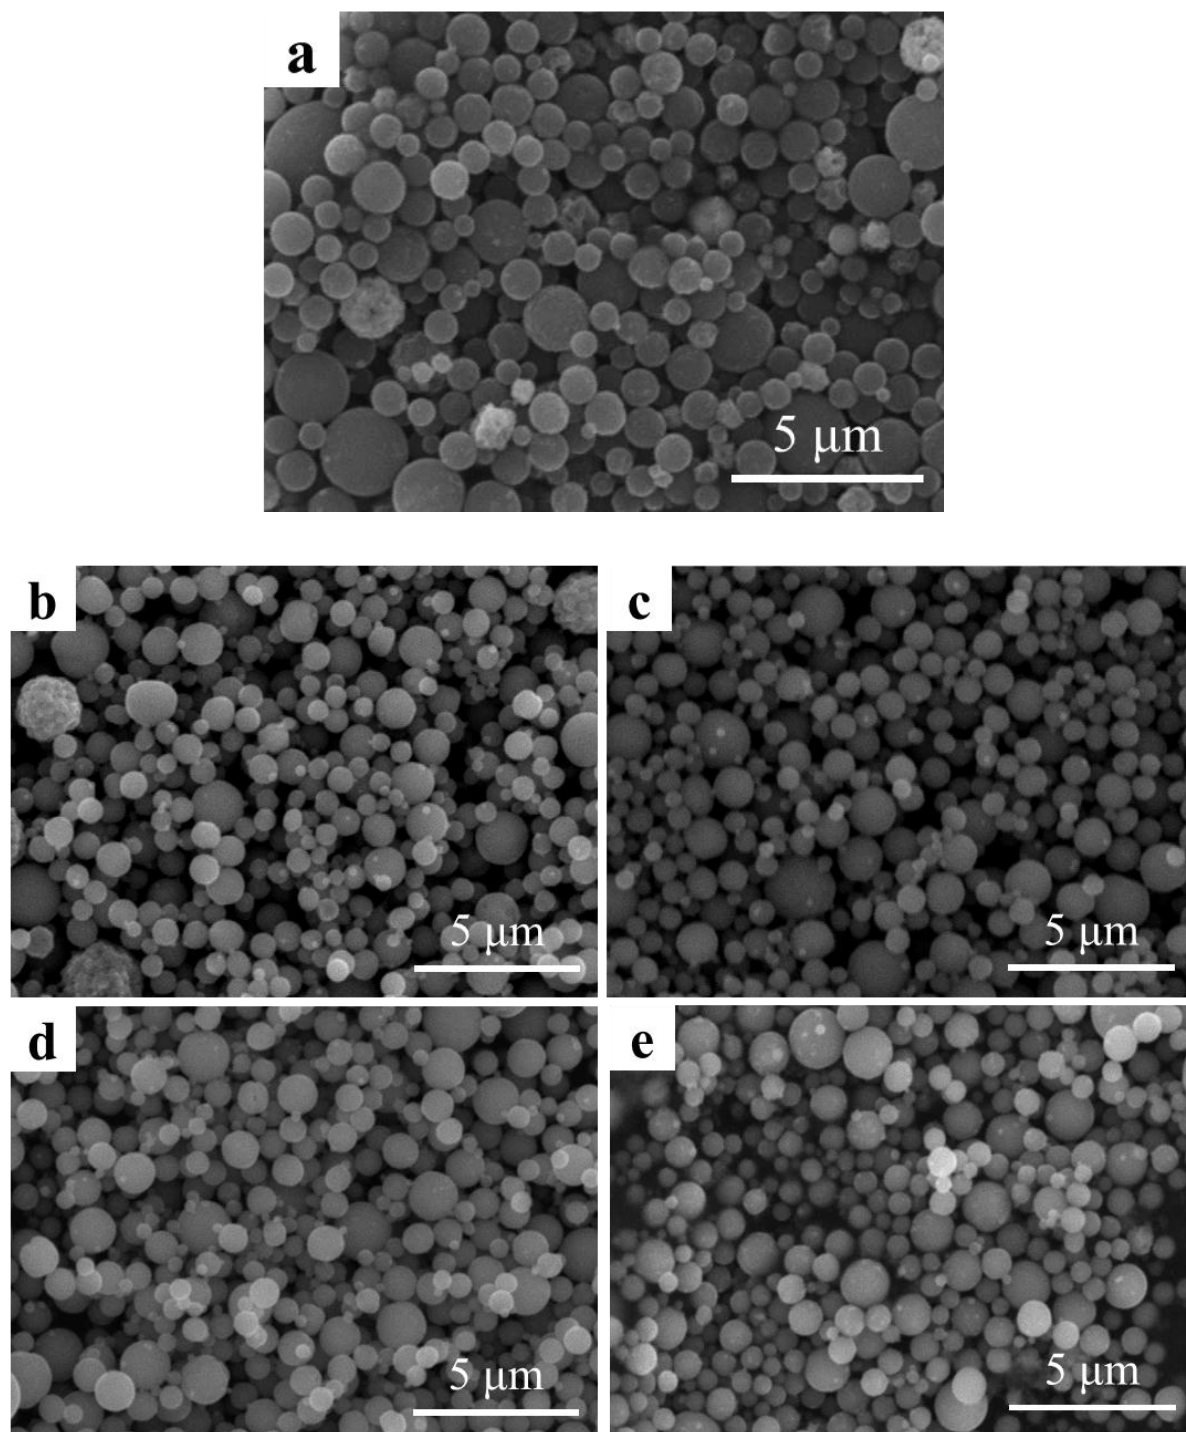

**Fig. S1** Morphologies of the  $V_2O_3$ -C precursor powders directly prepared by spray pyrolysis at various temperatures; (a) 600 °C (b) 700 °C, (c) 800 °C, (d) 900 °C, and (e) 1000 °C.

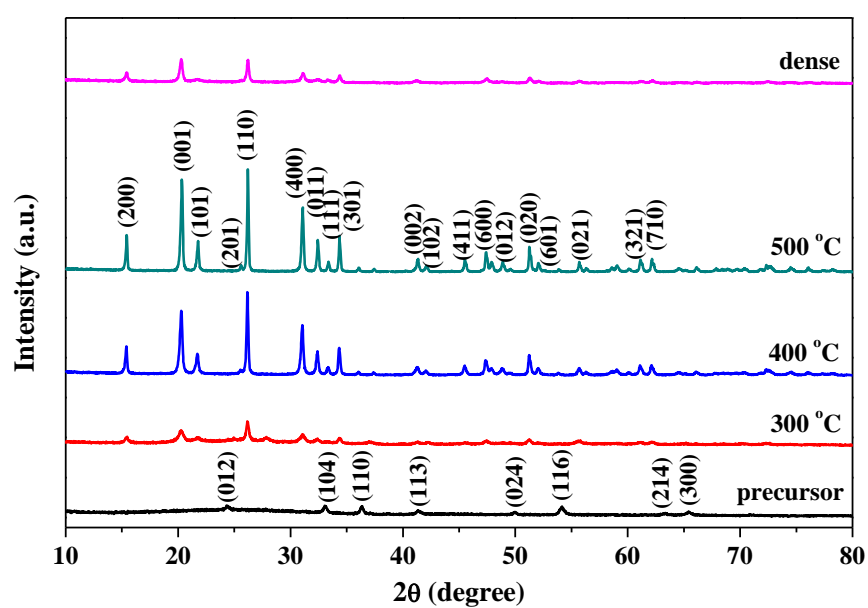

**Fig. S2** XRD patterns of the the  $V_2O_3$ -C precursor powders, combusted  $V_2O_5$  powders at different temperatures and dense structured  $V_2O_5$  powders.

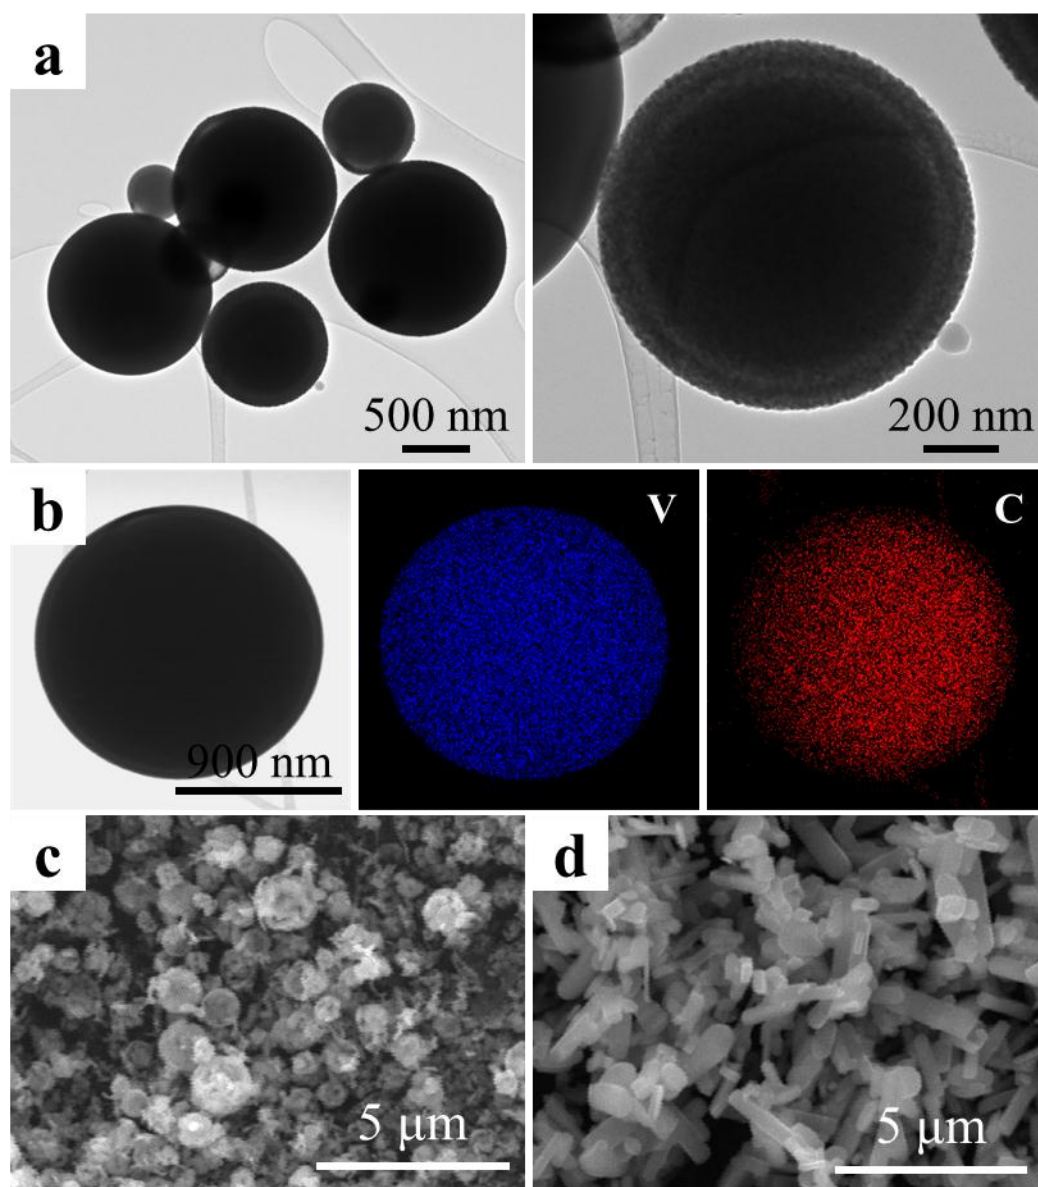

**Fig. S3** Morphologies of the  $V_2O_5$  powders obtained by combustion of  $V_2O_3$ -C composite powders at different temperatures; (a) TEM and (b) dot-mapping images of the powders combusted at 300 °C, (c) SEM image of the powders combusted at 500 °C, (d) SEM image of the powders combusted at 600 °C.

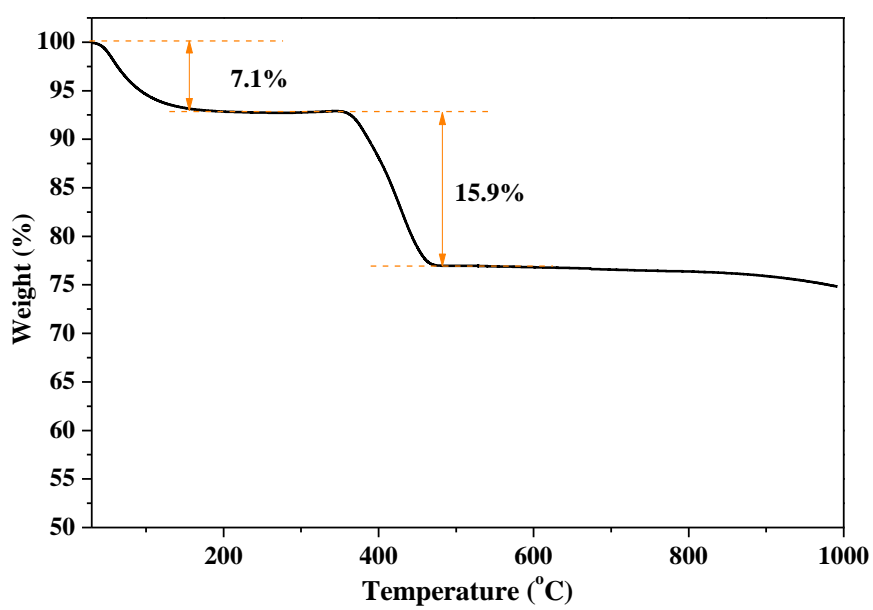

**Fig. S4** TG curve of the V<sub>2</sub>O<sub>5</sub>-C composite powders combusted at 300 °C.

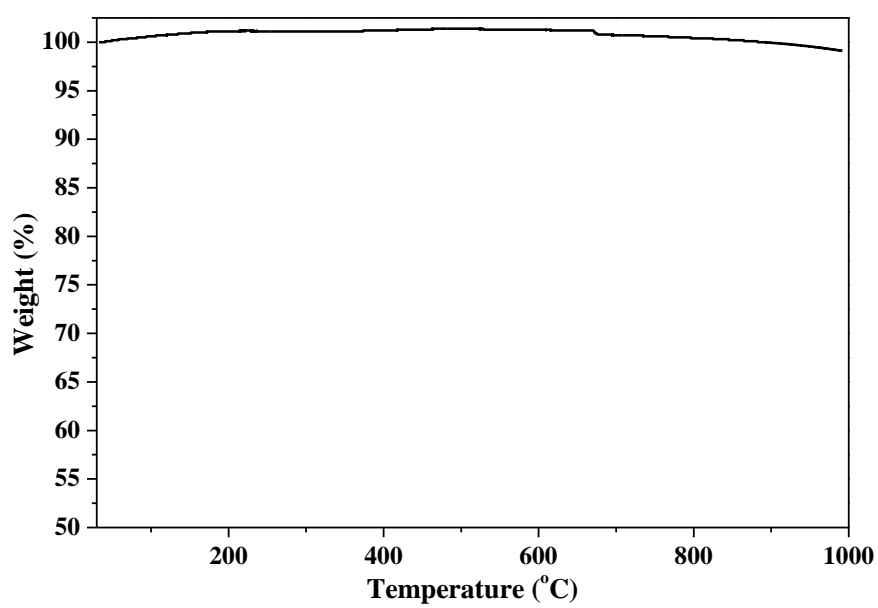

**Fig. S5** TG curve of the yolk-shell  $V_2O_5$  powders combusted at 400 °C.

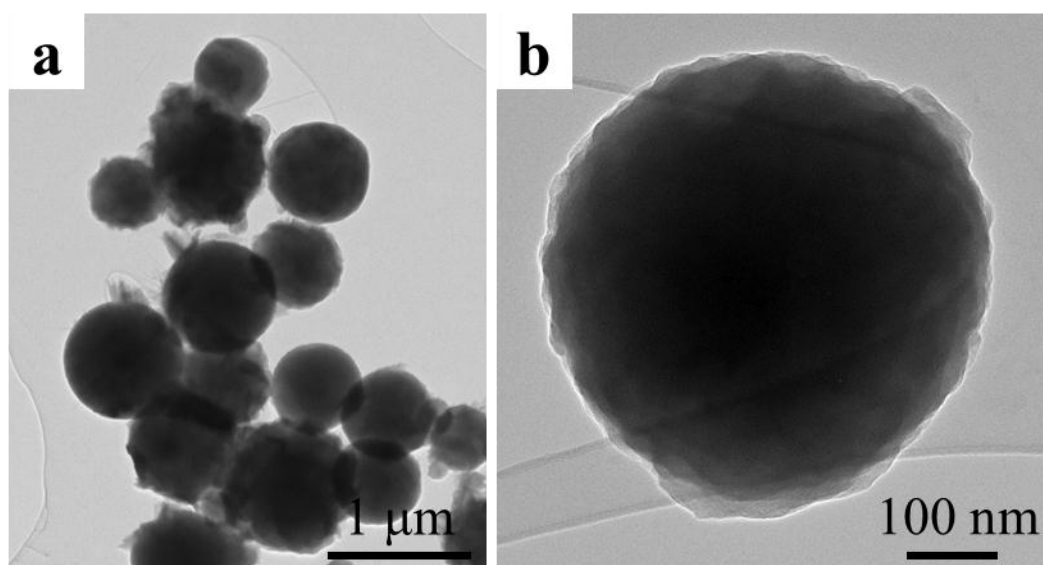

**Fig. S6** (a) low-resolution TEM and (b) high-resolution TEM images of the dense structured  $V_2O_5$  powders prepared by spray pyrolysis.
